# Supplementary material for: Semi-conductive micellar networks of all-conjugated diblock and triblock copolymer blends
Source: Royal Society of Chemistry journal article supplement (doi:10.1039/d3cc00081h), 2023-01-01
Supplement: d3cc00081h1.pdf [file d3cc00081h1.pdf]

Supplementary Information

for

**Semi-conductive micellar networks of all-conjugated diblock and  
triblock copolymer blends**

Junyoung Kim<sup>a</sup>, Wooyeol Chung<sup>a</sup>, Dogyun Kim<sup>a</sup>, Junwoo Kang<sup>a</sup>, Carlos Fitzgerald Grandes  
Reyes<sup>a</sup>, Jisu Jeong<sup>a</sup>, and Kyoung Taek Kim<sup>\*a</sup>

<sup>a</sup>*Department of Chemistry, Seoul National University, Seoul 08826, Republic of Korea.*

<sup>\*</sup>*E-mail:* [ktkim72@snu.ac.kr](mailto:ktkim72@snu.ac.kr)

## 1 **Materials**

2 Magnesium, *N*-bromosuccinimide (99%), 2-ethylhexyl bromide (95%), [1,3-  
3 bis(diphenylphosphino)propane]dichloronickel(II) [Ni(dppp)Cl<sub>2</sub>], and isopropyl magnesium  
4 chloride complex lithium complex solution (*i*PrMgCl·LiCl, 1.3M in THF) were purchased  
5 from Sigma Aldrich and used without further purification.

6 3-Bromothiophene (>97%), 3-hexylthiophene (>98%), and iodobenzene diacetate (>97%)  
7 were purchased from Tokyo Chemical Industry and used without purification.

8 Iodine was purchased from Alfa Aesar and used without purification.

9 Acetic acid (glacial, 99.7%), magnesium sulfate anhydrous (99.5%), sodium bicarbonate  
10 (99-100.5%), sodium sulfate anhydrous (99%), sodium thiosulfate anhydrous (95%),  
11 hydrochloric acid (35-37%), diethyl ether (99.5%), *n*-hexane (95%), acetone (99.5%),  
12 chloroform (99.5%), methyl alcohol (99.5%), tetrahydrofuran (99.5%), and dichloromethane  
13 (99.5%) were purchased from Samchun Chemicals.

14 Dichloromethane (DCM) and tetrahydrofuran (THF) were distilled over CaH<sub>2</sub> and  
15 sodium/benzophenone, respectively.

16

## 1 **Experimental Procedures**

### 2 *General Information*

3  $^1\text{H}$  NMR spectra were recorded on Agilent 500-MR DD2 magnetic resonance system and  
4 Varian/Oxford As-500 using  $\text{CD}_2\text{Cl}_2$  or  $\text{CDCl}_3$  as solvents. Molecular weights of polymers  
5 were measured on Agilent 1260 infinity gel permeation chromatography (GPC) system  
6 equipped with a PL gel  $5\ \mu\text{m}$  mixed D column and differential refractive index detectors. THF  
7 was used as the GPC eluent with a flow rate of  $1\ \text{mL min}^{-1}$  at  $35\ ^\circ\text{C}$ . A PS standard kit (Agilent  
8 Technologies) was used for calibration. Differential Scanning Calorimetry (DSC) was  
9 performed on a TA Instruments Q10 from  $0\ ^\circ\text{C}$  to  $300\ ^\circ\text{C}$  with a scan rate of  $10\ ^\circ\text{C min}^{-1}$  under  
10 an  $\text{N}_2$  atmosphere. Calibration was performed by measuring the melting temperature of indium  
11 ( $T_{\text{m}} = 429.75\ \text{K}$ ).

12 TEM was performed on a Hitachi 7600 operating at  $100\ \text{kV}$ . Specimens were prepared by  
13 placing a drop of the diluted polymer solution with anisole on a carbon-coated Cu grid (200  
14 mesh, EM science). After 30 seconds, the remaining solution on the grid was removed with  
15 filter paper, and the grid was dried for more than 4 h. The atomic force microscopy (AFM) was  
16 performed on a Bruker NanoScope V Multimode 8 device at ambient temperature in tapping  
17 mode using non-contact mode silicon tips from Nanoworld (Pointprobe tip, NCHR type) with  
18 spring constant of  $42\ \text{N m}^{-1}$  and tip radius of  $\leq 8\ \text{nm}$ .  $7\ \mu\text{L}$  of the diluted sample solution ( $0.1$   
19  $\text{mg/mL}$ ) was prepared and placed on a silicon wafer. Scanning electron microscopy (SEM) was  
20 performed on Hitachi S-4300 at an acceleration voltage of  $15\ \text{kV}$ . The sample was placed on a  
21 slide glass and then sputtered with Pt with a thickness of  $3\ \text{nm}$  by using Hitachi E-1030 ion  
22 sputter.

1 Doping of organogel from BCP blend of P3HT<sub>120</sub>-*b*-P3EHT<sub>100</sub> and P3HT<sub>54</sub>-*b*-P3EHT<sub>62</sub>-*b*-  
2 P3HT<sub>54</sub> was performed by following procedures. The glass substrates were sequentially  
3 washed in detergent solution, acetone, and isopropyl alcohol using an ultrasonic cleaner. Prior  
4 to the deposition of the solution, the glass substrates were treated with ultraviolet (UV)-ozone  
5 plasma for 20 min to obtain a uniform P3HT thin film. The 9:1 BCP blend of P3HT<sub>120</sub>-*b*-  
6 P3EHT<sub>100</sub> and P3HT<sub>54</sub>-*b*-P3EHT<sub>62</sub>-*b*-P3HT<sub>54</sub> in anisole (50 mg/mL) filtered by a 0.45  $\mu$ m  
7 PTFE filter. The organogel was prepared by annealed of the BCP blend at 70 °C for 1 h before  
8 cooling and equilibration at room temperature. The organogel was doped by immersion in 1.0–  
9 10 mM AuCl<sub>3</sub>/nitromethane solution for 1 h. The doped organogel was finally rinsed with  
10 methanol to remove excess dopants. Square-shaped gold electrodes with a thickness of 100  
11 nm, separated by a distance of 15 mm, were thermally evaporated through a patterned shadow  
12 mask for ohmic contact between the organogel and the measurement probe.

13 X-ray powder diffraction (powder XRD) data were collected with Cu-K $\alpha$  radiation ( $\lambda$  =  
14 1.5418 Å) on a Bruker D8 Advance powder diffractometer fitted with a 0.6 mm fixed  
15 divergence slit, knife-edge collimator and a LynxEye area detector. Data were collected  
16 between 5–30° (2 $\theta$ ) with a step width of 0.02°. The samples were drop casted from chloroform  
17 solution onto silicon wafers prior to analysis.

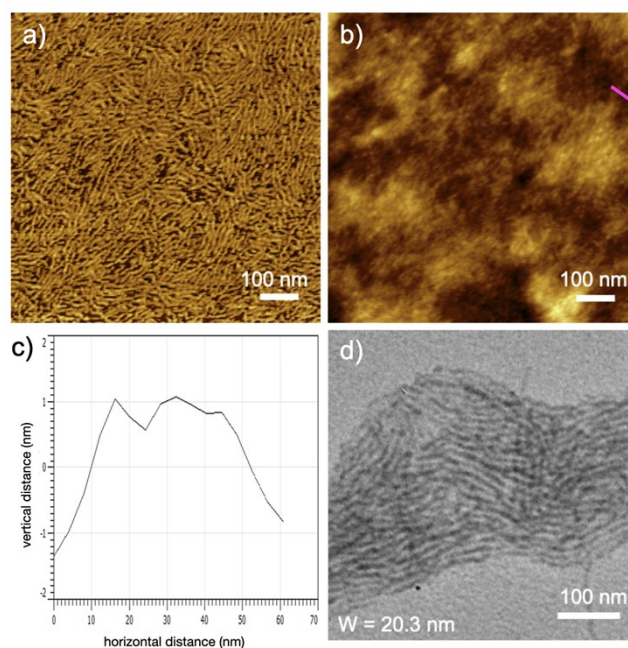

1

2 **Fig. S1** 1-D Nanowires obtained from the CDSA of P3HT<sub>54</sub>-*b*-P3EHT<sub>62</sub> (1 mg/mL in anisole, 90 °C, slow cooling).  
3 (a) AFM phase image, (b) AFM height image, (c) AFM height profile and (d) TEM image.

4

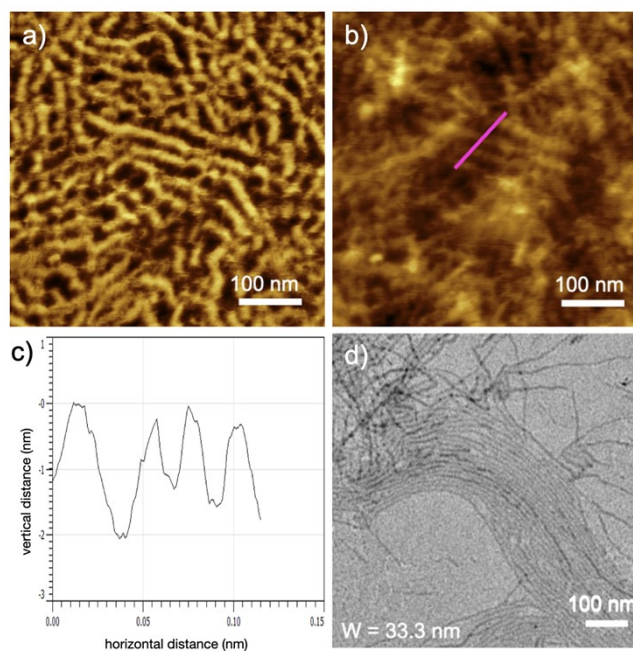

5

6 **Fig. S2** 1-D Nanowires obtained from the CDSA of P3HT<sub>120</sub>-*b*-P3EHT<sub>100</sub> (1 mg/mL in anisole, 90 °C, slow  
7 cooling). (a) AFM phase image, (b) AFM height image, (c) AFM height profile and (d) TEM image.

| Temperature (°C) | 45   | 50   | 55   | 60   | 62   | 64   | 66   | 68   | 70   |
|------------------|------|------|------|------|------|------|------|------|------|
| $L_n$ (nm)       | 35   | 113  | 243  | 544  | 780  | 1134 | 1826 | 2312 | 2970 |
| $\sigma$ (nm)    | 5.4  | 19.3 | 37.2 | 136  | 260  | 366  | 495  | 734  | 1057 |
| $D$              | 1.07 | 1.06 | 1.08 | 1.09 | 1.08 | 1.12 | 1.13 | 1.18 | 1.21 |

**Table S1** Average length value ( $L_n$ ), standard deviation ( $\sigma$ ) and their dispersity values ( $D$ ) of 1-D nanowires from the CDSA of P3HT<sub>120</sub>-*b*-P3EHT<sub>100</sub> at different annealing temperatures.

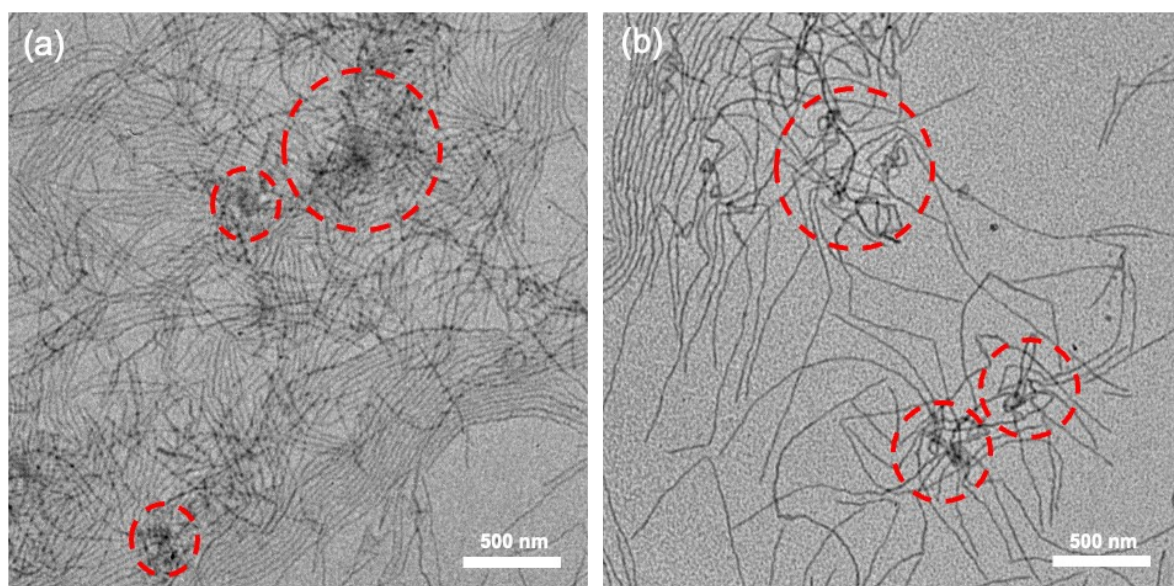

**Fig. S3** Self-assembled nanowires obtained from CDSA of P3HT<sub>54</sub>-*b*-P3EHT<sub>62</sub>-*b*-P3HT<sub>54</sub> (1 mg/mL, 70 °C, slow cooling) (a) in anisole, (b) in cyclohexane. Red circle indicates the formation of islands of bundles of self-assembled nanowires.



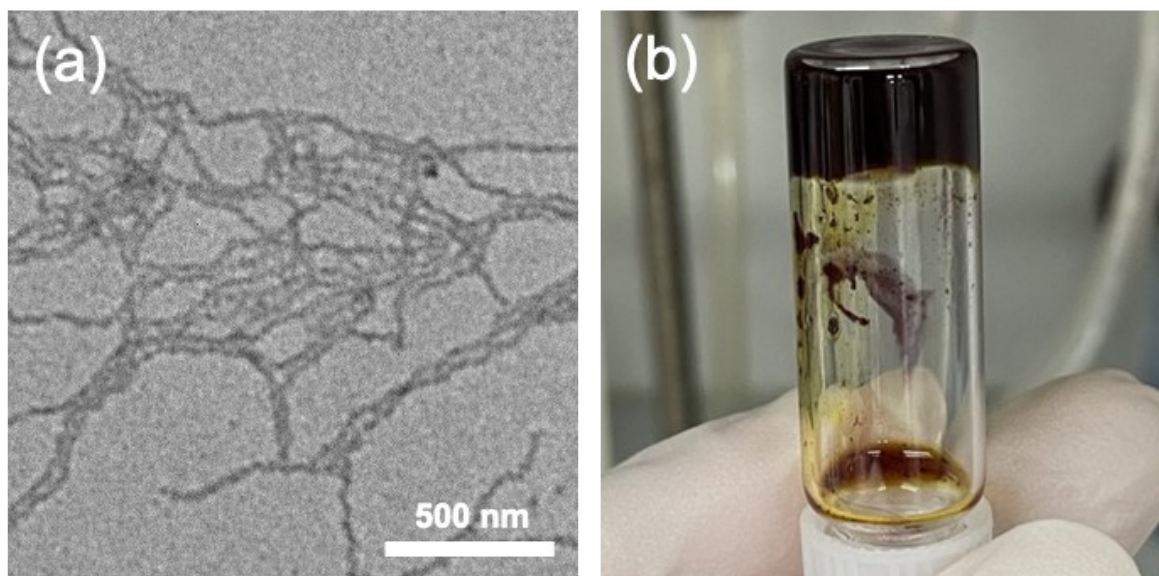

**Fig. S4** (a) TEM image and (b) photograph of the organogel obtained from CDSA of P3HT<sub>54</sub>-*b*-P3EHT<sub>62</sub>-*b*-P3HT-<sub>54</sub> (100 mg/mL in anisole, 70 °C, slow cooling).

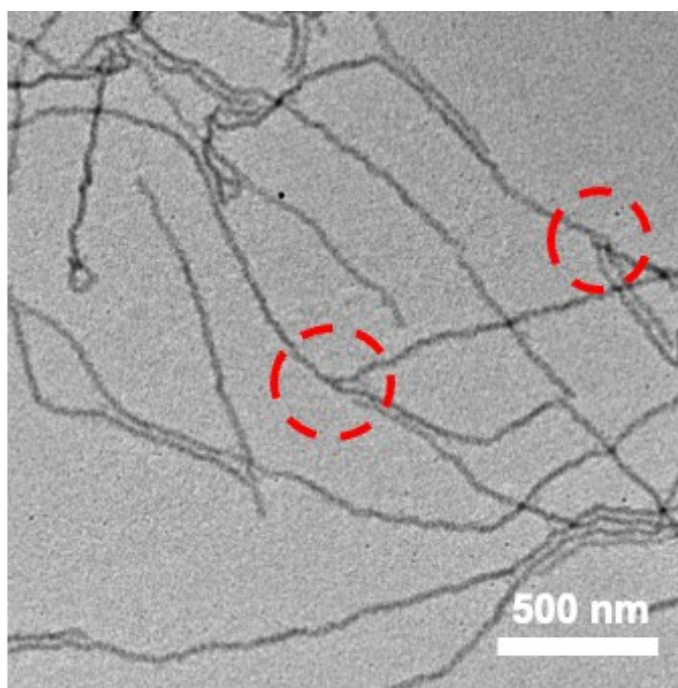

**Fig. S5** TEM image of Self-assembled nanowires obtained from the CDSA of the 9:1 (w/w) blend of P3HT<sub>120</sub>-*b*-P3EHT<sub>100</sub> and P3HT<sub>54</sub>-*b*-P3EHT<sub>62</sub>-*b*-P3HT<sub>54</sub> (20 mg/mL in anisole, 90 °C, slow cooling). Red circle indicates the formation of Y-junction and crosses of 1-D nanowires.

1 **Synthesis of 2-Bromo-3-hexyl-5-iodothiophene (1)**

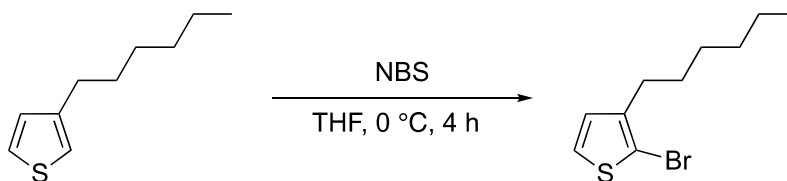

3 **2-Bromo-3-hexylthiophene.** 3-Hexylthiophene (10.00 g, 59.4 mmol) was dissolved in a dry  
4 THF (100 mL). To this solution, *N*-bromosuccinimide (10.78 g, 59.4 mmol) was added to the  
5 mixture and stirred for 4 h at 0 °C. Upon completion, water was poured into the mixture to  
6 quench the residual *N*-bromosuccinimide and extracted with diethyl ether. The combined  
7 organic layers were then washed with 10% Na<sub>2</sub>S<sub>2</sub>O<sub>3</sub> (aq), 10% KOH (aq), and brine and dried  
8 over anhydrous MgSO<sub>4</sub>. After filtration, residual solvents were removed under reduced  
9 pressure. The crude product was purified by silica gel column chromatography (eluent:  
10 hexane). The product was obtained as a yellow oil (12.4 g, 84.5%). <sup>1</sup>H NMR (500 MHz,  
11 CD<sub>2</sub>Cl<sub>2</sub>) δ 7.23 (d, *J* = 5.6 Hz, 1H), 6.84 (d, *J* = 5.6 Hz, 1H), 2.62 – 2.52 (m, 2H), 1.58 (ddd, *J*  
12 = 17.6, 12.7, 7.7 Hz, 2H), 1.40 – 1.26 (m, 6H), 0.90 (td, *J* = 5.6, 2.2 Hz, 3H).

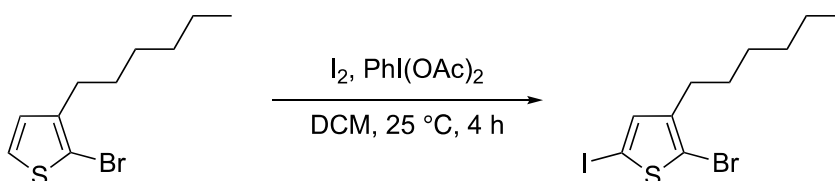

14

1

15 **2-Bromo-5-iodo-3-hexylthiophene.** 2-Bromo-3-hexylthiophene (12.4 g, 50.4 mmol) was  
16 dissolved in dry CH<sub>2</sub>Cl<sub>2</sub> (50 mL) under N<sub>2</sub>. Iodine (3.54 g, 27.9 mmol), and iodobenzene  
17 diacetate (9.72 g, 30.2 mmol) were added to the mixture and stirred at room temperature for 4



1 h. The reaction was quenched by the addition of 10% Na<sub>2</sub>S<sub>2</sub>O<sub>3</sub> (aq). The mixture was extracted  
2 with diethyl ether. Combined organic layers were washed with brine and dried over anhydrous  
3 MgSO<sub>4</sub>. After filtration, residual solvents were removed by evaporation under reduced  
4 pressure. The residue was purified by silica gel column chromatography (eluent: hexane) to  
5 give a 2-bromo-5-iodo-3-hexylthiophene (**1**) as a pale-yellow oil (15 g, 80%). <sup>1</sup>H NMR (500  
6 MHz, CD<sub>2</sub>Cl<sub>2</sub>) δ 6.94 (d, *J* = 1.1 Hz, 1H), 2.54 – 2.46 (m, 2H), 1.58 – 1.46 (m, 2H), 1.35 – 1.22  
7 (m, 6H), 0.91 – 0.83 (m, 3H). <sup>13</sup>C NMR (126 MHz, CD<sub>2</sub>Cl<sub>2</sub>) δ 144.94, 138.63, 111.93, 71.33,  
8 54.27, 54.06, 53.84, 53.62, 53.41, 32.00, 31.97, 29.99, 29.51, 29.17, 23.07, 22.98, 14.30, 14.25.  
9 HRMS (ESI): calcd for C<sub>10</sub>H<sub>14</sub>BrIS [M<sup>+</sup>] = 372.9123 Da; found: 372.9074 Da.

10

1 **Synthesis of 2-bromo-3-(2-ethylhexyl)-5-iodothiophene (2)**

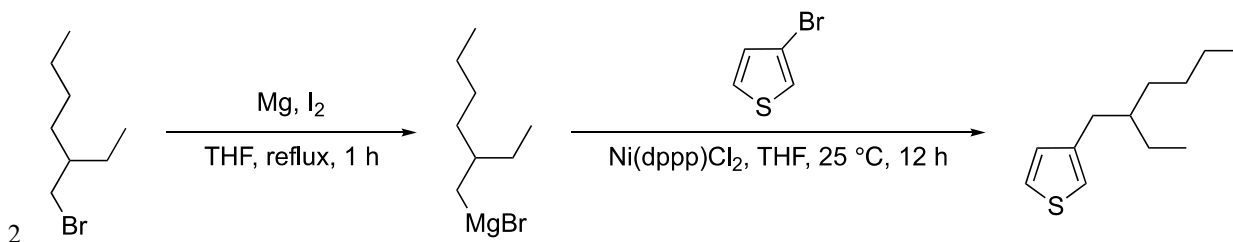

3 **3-(2-Ethylhexyl)thiophene.** To a mixture of magnesium turnings (3.06 g, 126 mmol), dry THF  
 4 (15 mL), and a catalytic amount of iodine in an oven-dried Schlenk flask (100 mL), a solution  
 5 of 2-ethylhexylbromide (3.06 g, 126 mmol) in dry THF (30 mL) was added slowly at 0 °C  
 6 under N<sub>2</sub>. After refluxing for 1 h, the solution was added dropwise to a mixture of 3-  
 7 bromothiophene (15 g, 93 mmol), Ni(dppp)Cl<sub>2</sub> (0.51 g, 0.9 mmol), and dry THF (50 mL)  
 8 placed in an oven-dried Schlenk flask (250 mL) at 0 °C. After the mixture was stirred overnight  
 9 at room temperature, the reaction was quenched by pouring 1 M HCl (aq) into the mixture.  
 10 After extraction with CHCl<sub>3</sub>, the organic layer was dried over anhydrous Mg<sub>2</sub>SO<sub>4</sub> and  
 11 concentrated under reduced pressure. The crude product was purified by column  
 12 chromatography using hexane as an eluent to obtain a 3-(2-ethylhexyl)thiophene as a clear  
 13 liquid. (16.2 g, 90%). <sup>1</sup>H NMR (500 MHz, CD<sub>2</sub>Cl<sub>2</sub>) δ 7.25 (dd, *J* = 4.9, 3.0 Hz, 1H), 6.93 (td,  
 14 *J* = 4.5, 1.7 Hz, 2H), 2.58 (d, *J* = 6.9 Hz, 2H), 1.61 – 1.54 (m, 1H), 1.36 – 1.20 (m, 8H), 0.89  
 15 (td, *J* = 7.2, 3.3 Hz, 6H).

16

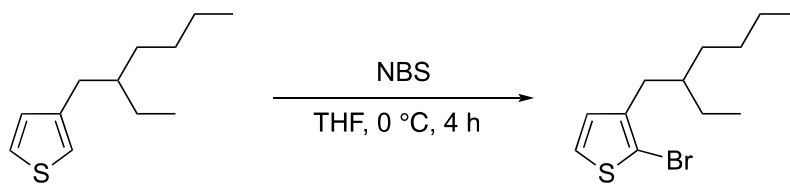

1

2 **2-Bromo-3-(2-ethylhexyl)thiophene.** Using 3-(2-ethylhexyl)thiophene (10.00 g, 50.9 mmol)  
 3 and *N*-bromosuccinimide (9.24 g, 50.9 mmol), the reaction proceeded in the same manner as  
 4 the synthesis of 2-bromo-3-hexylthiophene, which yield 2-bromo-3-(2-ethylhexyl)thiophene  
 5 as a yellow oil (12.6 g, 86.1%). <sup>1</sup>H NMR (500 MHz, CD<sub>2</sub>Cl<sub>2</sub>) δ 7.23 (d, *J* = 5.6 Hz, 1H), 6.81  
 6 (d, *J* = 5.6 Hz, 1H), 2.52 (d, *J* = 7.2 Hz, 2H), 1.67 – 1.58 (m, 1H), 1.37 – 1.21 (m, 8H), 0.93 –  
 7 0.84 (m, 6H).

8

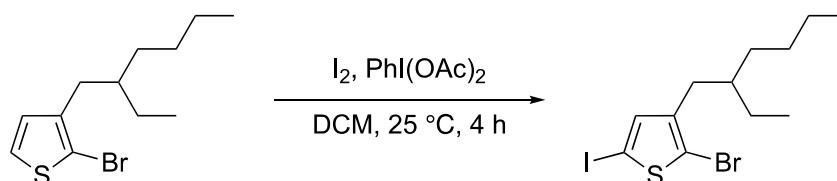

9

**2**

10 **2-Bromo-3-(2-ethylhexyl)-5-iodothiophene (2).** Using 2-bromo-3-(2-ethylhexyl)thiophene  
 11 (12.6 g, 46mmol), iodine (3.23 g, 25.5 mmol), and iodobenzene diacetate (8.87 g, 27.6 mmol),  
 12 the reaction proceeded in the same manner as the synthesis of 2-bromo-3-hexyl-5-  
 13 iodothiophene, which yield 2-bromo-3-(2-ethylhexyl)-5-iodothiophene (**2**) as a pale yellow oil  
 14 (14.8 g, 80.5%). <sup>1</sup>H NMR (500 MHz, CD<sub>2</sub>Cl<sub>2</sub>) δ 6.93 (d, *J* = 1.2 Hz, 1H), 2.46 (d, *J* = 7.1 Hz,  
 15 2H), 1.59 – 1.50 (m, 1H), 1.34 – 1.19 (m, 8H), 0.92 – 0.83 (m, 6H). <sup>13</sup>C NMR (126 MHz,  
 16 CD<sub>2</sub>Cl<sub>2</sub>) δ 144.19, 139.09, 112.60, 71.29, 54.27, 54.06, 53.84, 53.62, 53.41, 40.40, 33.74,

1 32.76, 29.16, 29.13, 25.96, 23.50, 23.41, 14.28, 11.21, 10.95 HRMS (ESI): calcd for  
 2 C<sub>12</sub>H<sub>18</sub>BrIS [M<sup>+</sup>] = 399.9357 Da; found: 399.9360 Da.

3

#### 4 **Synthesis of BCPs**

5

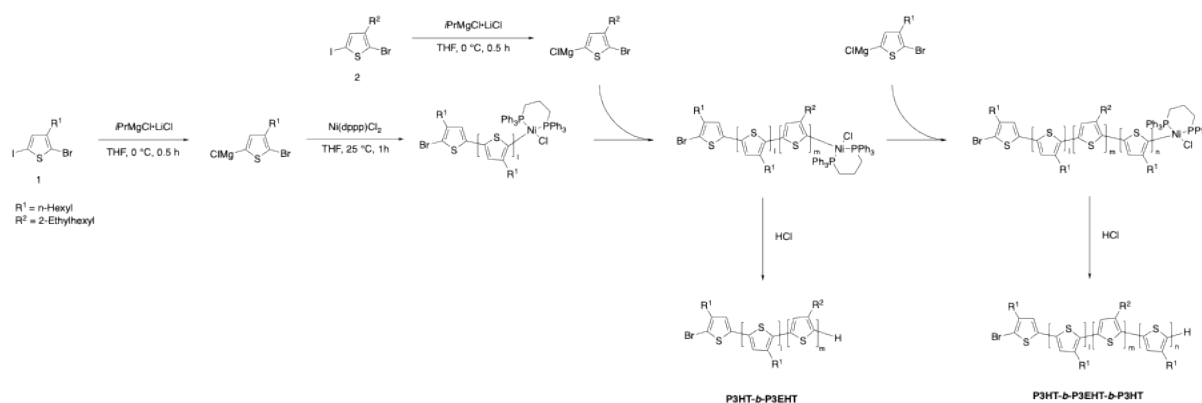

6

7 **Scheme S1** Synthetic scheme of P3HT-*b*-P3EHT and P3HT-*b*-P3EHT-*b*-P3HT.

8

9 **P3HT-*b*-P3EHT.** Schlenk flasks (100 mL) were flame-dried before use. **1** (0.3 mg, 0.8 mmol)  
 10 was placed in one of the flasks under N<sub>2</sub>. After adding dry THF (20mL), the solution was  
 11 cooled to 0 °C. 1.3 M solution of *i*PrMgCl·LiCl in THF (0.62 mL, 0.8 mmol) was added via  
 12 syringe and stirred for 30 min at 0 °C for activation. In the other flask, **2** (0.32 mg, 0.8 mmol)  
 13 was activated with *i*PrMgCl·LiCl (0.62 mL, 0.8 mmol) in the same manner. Activated **1** was  
 14 warmed up to room temperature, and Ni(dppp)Cl<sub>2</sub> catalyst (8 mg, 0.015 mmol) was added in  
 15 one portion and stirred for 1 hour. The solution of activated **2** was added to the reaction mixture  
 16 via syringe. After stirring for 1 hour, the polymerization was quenched by pouring 1 M HCl

(aq). The crude polymer was washed by Soxhlet extraction using methanol and hexane and then extracted using  $\text{CHCl}_3$ . The extracted polymer was concentrated in vacuo, which yielded a purple solid of P3HT-*b*-P3EHT.

4

**P3HT-*b*-P3EHT-*b*-P3HT.** To synthesize P3HT-*b*-P3EHT-*b*-P3HT, Two batches of **1** and one batch of **2** were prepared in Schlenk flasks (100 mL). Polymerization proceeded in the same manner as the synthesis of P3HT-*b*-P3EHT. Before quenching the P3HT-*b*-P3EHT diblock copolymer, the second batch of activated **1** (0.8 mmol in 20 mL THF) was added via syringe. After 1 hour of stirring, the polymerization was quenched by pouring 1 M HCl (aq). The crude polymer was washed by Soxhlet extraction using methanol and hexane and then extracted using  $\text{CHCl}_3$ . The extracted polymer was concentrated in vacuo, which yielded a purple solid of P3HT-*b*-P3EHT-*b*-P3HT.

**Table S2** Polymerization results of BCPs

| Entry    | [ <b>1</b> ] : [ <b>2</b> ] : [ <b>1</b> ] : [Ni] | Yield (%) | $M_n^{\text{P1},b}$ [kDa] | $M_n^{\text{P2},b}$ [kDa] | $M_n^{\text{P3},b}$ [kDa] | $\bar{D}^b$ |
|----------|---------------------------------------------------|-----------|---------------------------|---------------------------|---------------------------|-------------|
| <b>1</b> | 60 : 0 : 0 : 1                                    | 77        | 11.2                      | -                         | -                         | 1.08        |
| <b>2</b> | 0 : 50 : 0 : 1                                    | 68        | 9.9                       | -                         | -                         | 1.12        |
| <b>3</b> | 60 : 50 : 0 : 1                                   | 75        | 9.1                       | 21.4                      | -                         | 1.15        |
| <b>4</b> | 120 : 100 : 0 : 1                                 | 81        | 20.5                      | 41.2                      | -                         | 1.18        |
| <b>5</b> | 60 : 100 : 0 : 1                                  | 73        | 8.2                       | 19.8                      | -                         | 1.19        |
| <b>6</b> | 50 : 70 : 50 : 1                                  | 66        | 10.1                      | 21.5                      | 28.8                      | 1.32        |

<sup>a</sup>Isolated yield, <sup>b</sup>Number-average molecular weight ( $M_n$ ) and dispersity ( $\bar{D}$ ) determined by GPC (THF) using PS standards. P1, P2, and P3 indicate the molecular weight of the first block, deblock copolymer and triblock copolymer, respectively.

18

1 *NMR spectra of monomers and BCPs*

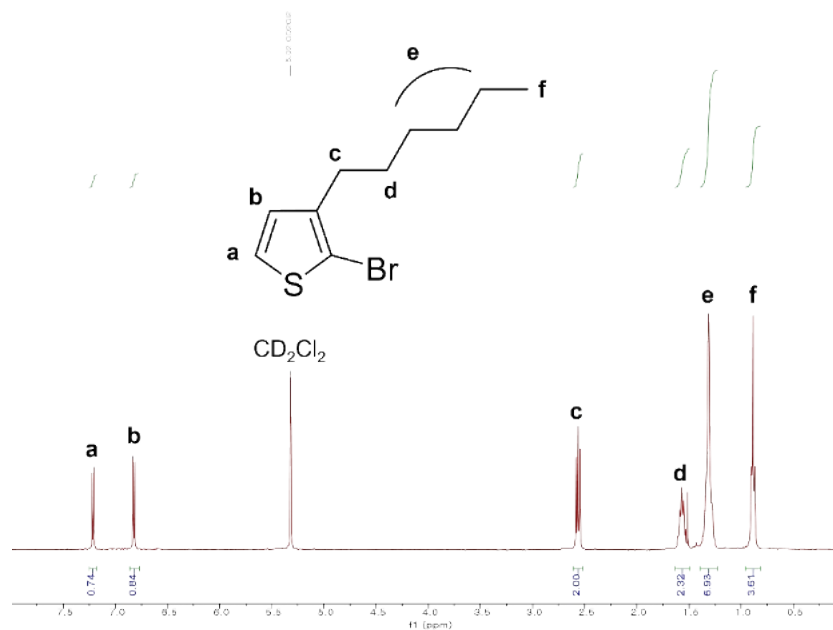

2

3 **Fig. S6** <sup>1</sup>H NMR spectra of 2-Bromo-3-hexylthiophene.

4

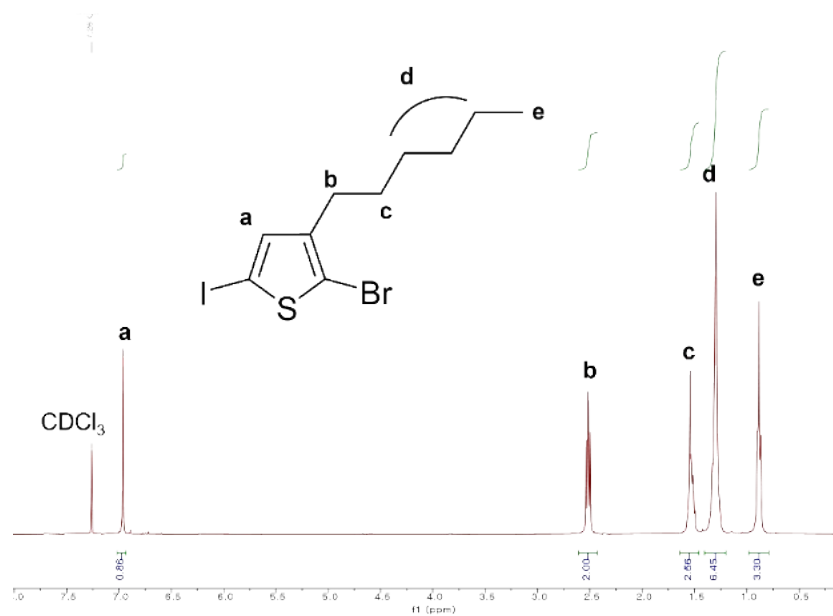

5

6 **Fig. S7** <sup>1</sup>H NMR spectra of 2-Bromo-3-hexyl-5-iodothiophene.

7

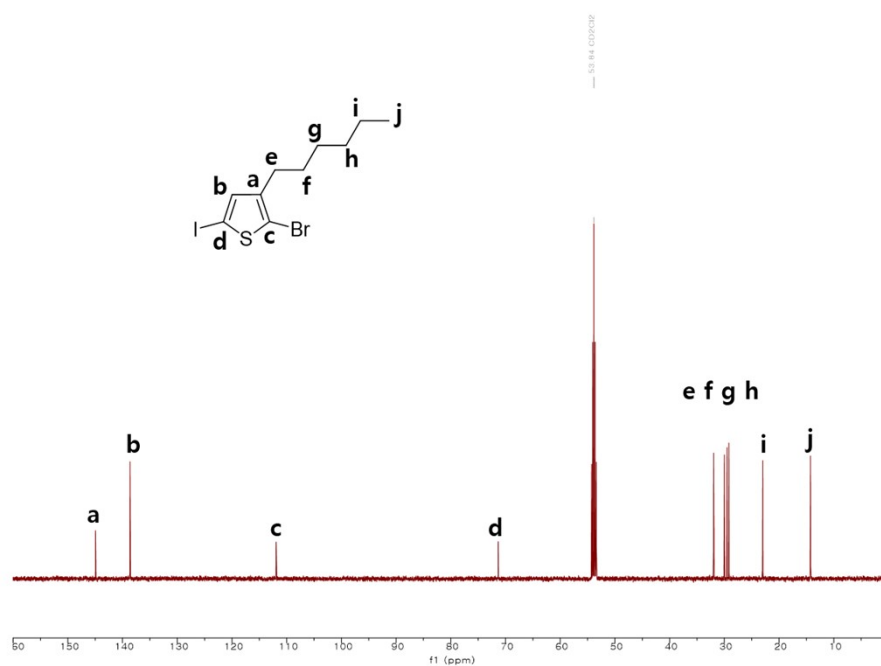

1

2 **Fig. S8**  $^{13}\text{C}$  NMR spectra of 2-Bromo-3-hexyl-5-iodothiophene.

3

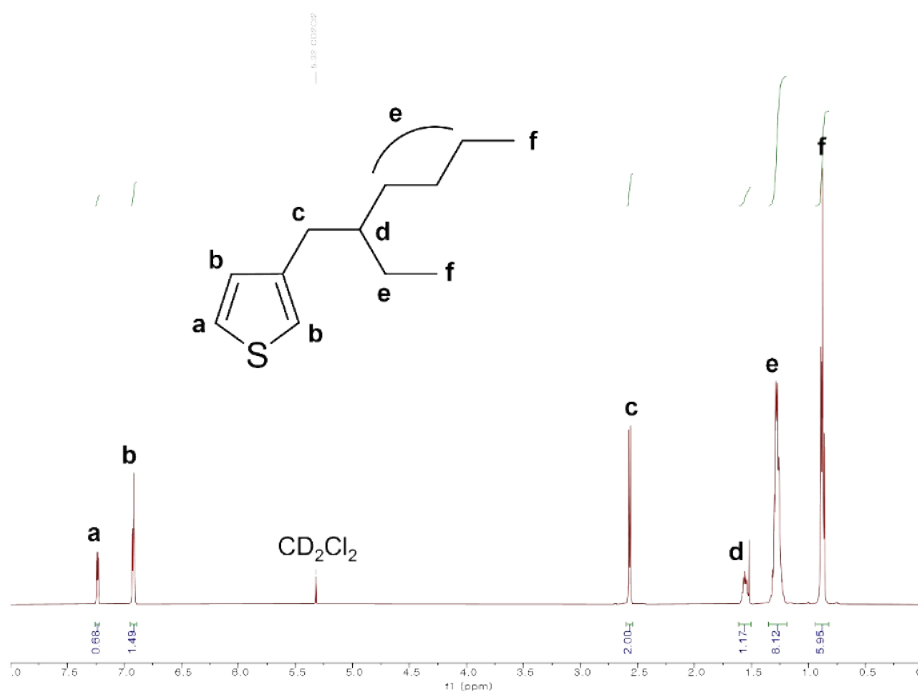

4

5 **Fig. S9**  $^1\text{H}$  NMR spectra of 3-(2-ethylhexyl)thiophene



1

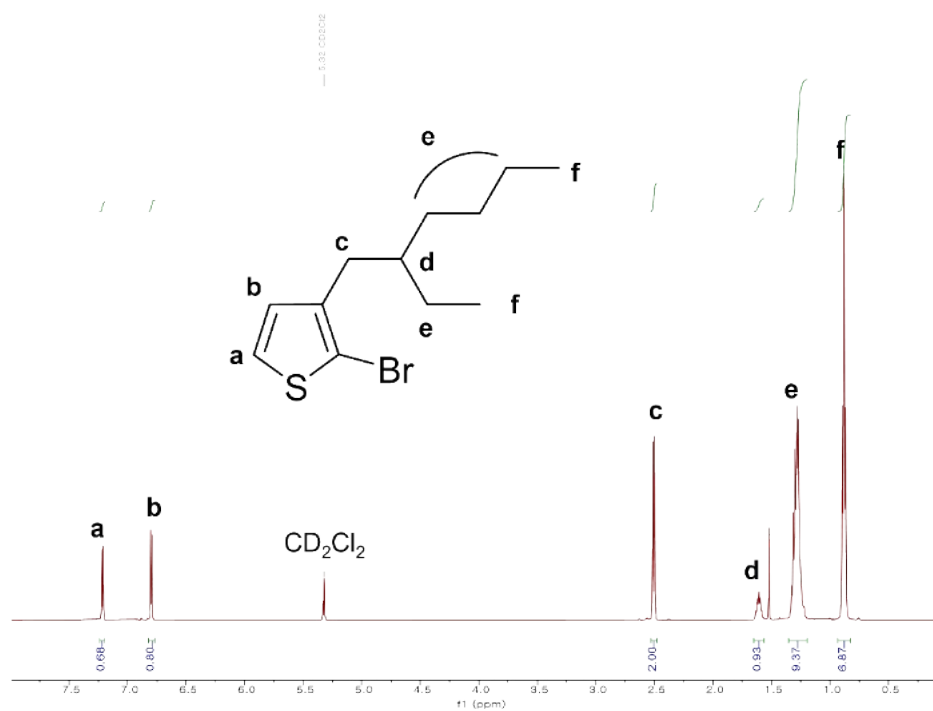

2

3 **Fig. S10** <sup>1</sup>H NMR spectra of 2-Bromo-3-(2-ethylhexyl)thiophene.

4

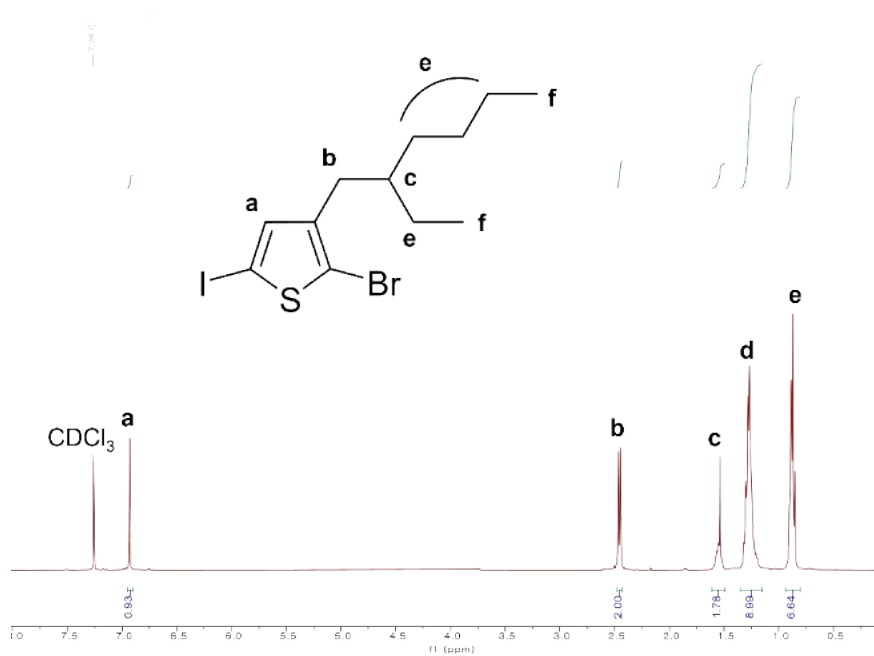

5

6 **Fig. S11** <sup>1</sup>H NMR spectra of 2-Bromo-3-(2-ethylhexyl)-5-iodothiophene.

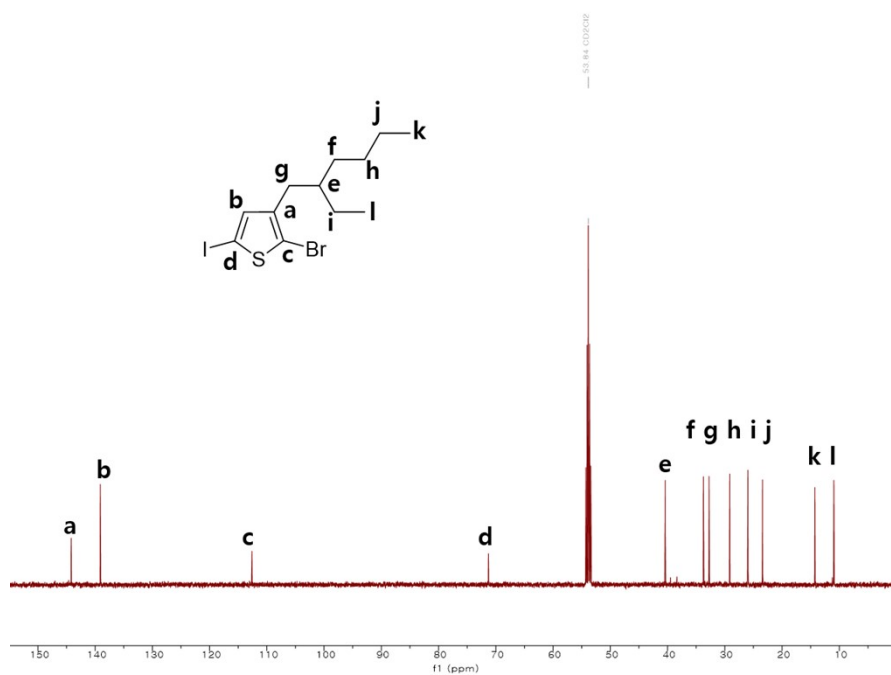

1

2 **Fig. S12** <sup>13</sup>C NMR spectra of 2-Bromo-3-(2-ethylhexyl)-5-iodothiophene.

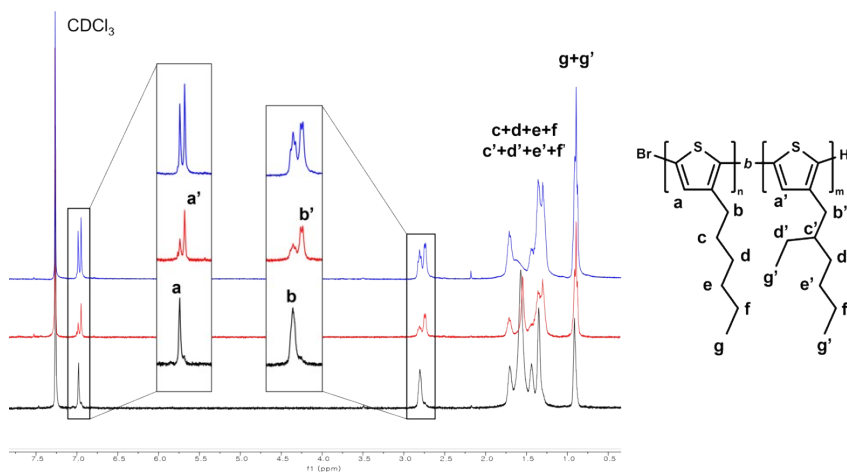

3

4 **Fig. S13** Stacked <sup>1</sup>H NMR spectra of P3HT (black), P3HT<sub>120</sub>-b-P3EHT<sub>100</sub> (red), and P3HT<sub>54</sub>-b-P3EHT<sub>62</sub>-b-  
 5 P3HT<sub>54</sub> (blue).

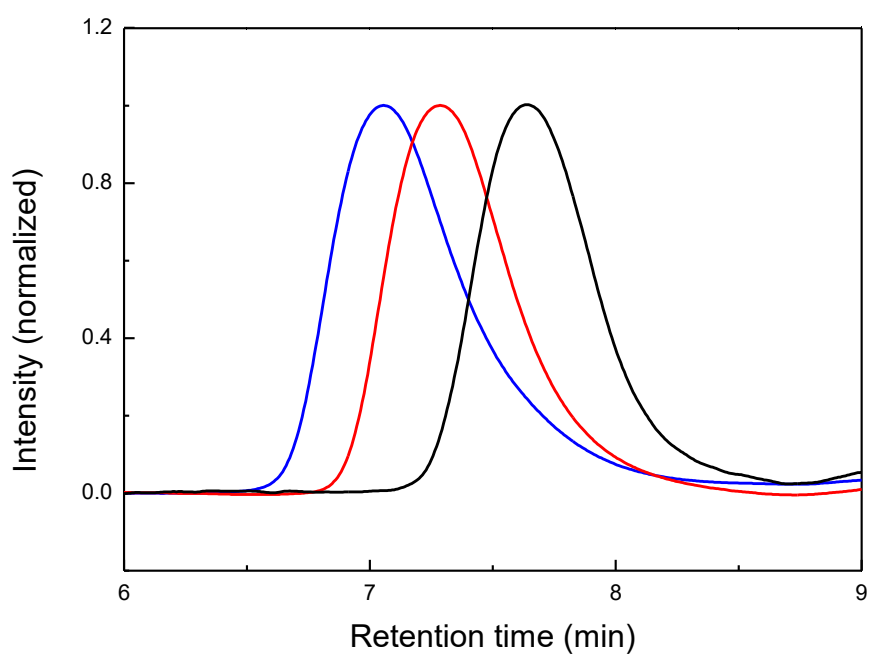

1

2 **Fig. S14** GPC chromatogram of P3HT<sub>54</sub> (black), P3HT<sub>54</sub>-*b*-P3EHT<sub>62</sub> (red), and P3HT<sub>54</sub>-*b*-P3EHT<sub>62</sub>-*b*-P3HT<sub>54</sub>  
 3 (blue).

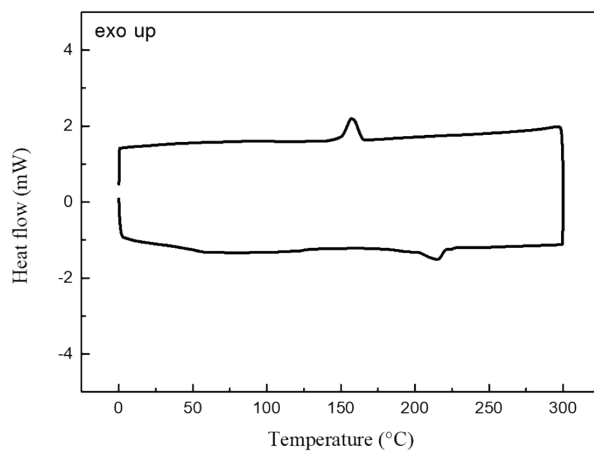

4

5 **Fig. S15** DSC thermogram of P3HT<sub>120</sub>-*b*-P3EHT<sub>100</sub>,  $T_m = 169.2$  °C

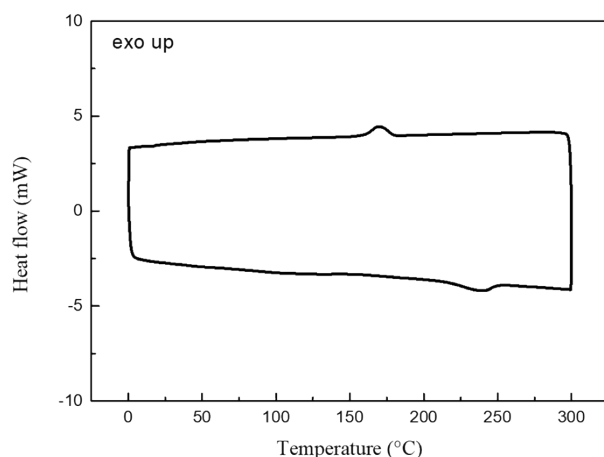

**Fig. S16** DSC thermogram of P3HT<sub>54</sub>-*b*-P3EHT<sub>62</sub>-*b*-P3HT<sub>54</sub>,  $T_m = 144.3\text{ }^{\circ}\text{C}$

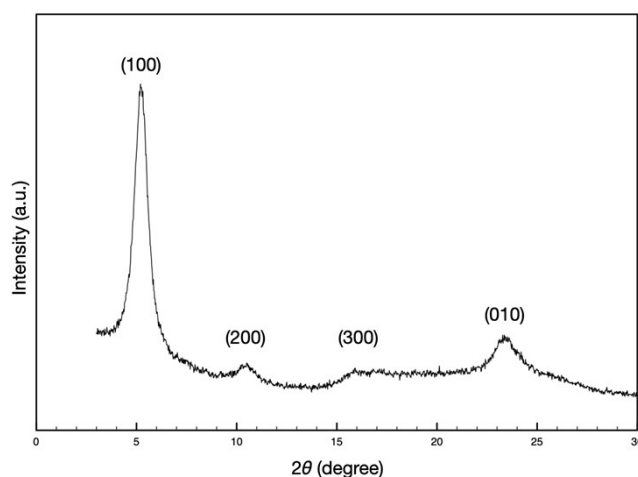

**Fig. S17** PXRD intensities as a function of the scattering angle  $2\theta$  for P3HT<sub>54</sub>-*b*-P3EHT<sub>62</sub>.

**Additional comments on PXRD data.** X-ray diffraction pattern of P3HT<sub>54</sub>-*b*-P3EHT<sub>62</sub> showed peaks at  $2\theta = 5.20^{\circ}$ ,  $10.50^{\circ}$ ,  $15.92^{\circ}$ , and  $23.36^{\circ}$ . The (100), (200), and (300) reflection peaks at  $2\theta = 5.20^{\circ}$ ,  $10.50^{\circ}$ , and  $15.92^{\circ}$  correspond to a lamellar ordering with  $d$ -spacings of 17.0 Å, 8.42 Å, and 5.56 Å, respectively, as reported in previous studies.<sup>1-4</sup> The (010) reflection peak at  $2\theta = 23.26^{\circ}$  corresponds to a  $\pi$ - $\pi$  stacking with a  $d$ -spacing of 3.80 Å.

## 1 References

- 2 1. Ahmed, E.; Ren, G.; Kim, F. S.; Hollenbeck, E. C.; Jenekhe, S. A. Oligothiophene-  
3 Functionalized Naphthalene Diimides: Synthesis, Self-Assembly of Nanowires, Electron  
4 Transport, and Use as Acceptor in Solar Cells *Chem. Mater.* **2011**, *23*, 4563–4577. (DOI:  
5 10.1021/cm2019668)
- 6 2. Park, Y. D.; Lee, H. S.; Choi, Y. J.; Kwak, D.; Cho, J. H.; Lee, S.; Cho, K. Solubility-  
7 Induced Ordered Polythiophene Precursors for High-Performance Organic Thin-Film  
8 Transistors *Adv. Funct. Mater.* **2009**, *19*, 1200–1206. (DOI: 10.1002/adfm.200801763)
- 9 3. Guo, S.; Brandt, C.; Andreev, T.; Metwalli, E.; Wang, W.; Perlich, J.; Müller-Buschbaum,  
10 P. First Step into Space: Performance and Morphological Evolution of P3HT:PCBM Bulk  
11 Heterojunction Solar Cells under AM0 Illumination *ACS Appl. Mater.*  
12 *Interfaces* **2014**, *6*, 17902–17910. (DOI: 10.1021/am504608p)
- 13 4. Li, X.; Wolanin, P. J.; MacFarlane, L. R.; Harniman, R. L.; Qian, J.; Gould, O. E. C.; Dane,  
14 T. G.; Rudin, J.; Cryan, M. J.; Schmaltz, T.; Frauenrath, H.; Winnik, M. A.; Faul, C. F. J.;  
15 Manners, I. Uniform electroactive fibre-like micelle nanowires for organic electronics *Nat.*  
16 *Commun.* **2017**, *8*, 15909. (DOI: 10.1038/ncomms15909)

17
